# Supplementary material for: High-Throughput Sequencing Reveals Cyclamen persicum Mill. as a Natural Host for Fig Mosaic Virus
Source: PubMed Central journal article supplement (PMC6316199; doi:10.3390/v10120684), 2018-12-03
Supplement: viruses-10-00684-s001.pdf [file viruses-10-00684-s001.pdf]

## Supplementary Materials:

**Table S1.** List of primers, designed on sequences of HTS-generated contigs, used in RT-PCR assays to amplify the full genomic RNA segments of FMV from Cic accession.

| Primers | Sequence (5' to 3')        | Nucleotide Position | Amplicon Size (bp) | Segment     |
|---------|----------------------------|---------------------|--------------------|-------------|
| R1-1s   | AGTAGTGAACCTCCCTTTATTAT    | 1-22                | 1057               | <b>RNA1</b> |
| R1-1a   | AATTGCAATCATTTAAGTACGT     | 1036-1057           |                    |             |
| R1-2s   | TATACCAAGATTGTTTCAGATAG    | 953-974             | 1081               |             |
| R1-2a   | GCCAAATGAATGGTTTAAACAGC    | 2013-2034           |                    |             |
| R1-3s   | TCATGCAAATAAATTCCTGGGA     | 1911-1932           | 985                |             |
| R1-3a   | CTGAATTTATAAATCTGATAAA     | 2875-2896           |                    |             |
| R1-4s   | AGCTACCAGATAATCTAGATTT     | 2801-2822           | 1222               |             |
| R1-4a   | GAACAGTTCATTACCAACTATGA    | 4001-4023           |                    |             |
| R1-5s   | ATATTCAAACAGGTTTGATTGT     | 3918-3939           | 1224               |             |
| R1-5a   | GCAATATCTTGAAGTTAAAAGG     | 5121-5142           |                    |             |
| R1-6s   | AGTGACAATGGCTAGACCATCA     | 5022-5043           | 1214               |             |
| R1-6a   | ATCGGTGCAACATTAAACACTC     | 6215-6236           |                    |             |
| R1-7s   | GAGTTGAACCAACATCTTTATA     | 6140-6161           | 899                |             |
| R1-7a   | AGTAGTGTTCTCCCTTTAATAT     | 7018-7039           |                    |             |
| R2-1s   | AGTAGTGAACCTCCTCTTAAACAAAT | 1-25                | 1250               | <b>RNA2</b> |
| R2-1a   | TAGGTGCACTTATAACAAAGGTT    | 1228-1250           |                    |             |
| R2-2s   | ATGTTTATGTTGGTCAAATCTGT    | 1155-1177           | 1097               |             |
| R2-2a   | AGTAGTGTTCTCCTCTTAAACATAAC | 2051-2252           |                    |             |
| R3-1s   | AGTAGTGAACCTCCATAATTAAGTC  | 1-25                | 890                | <b>RNA3</b> |
| R3-1a   | TTGCCTATAAGATTTAGGGCTT     | 869-890             |                    |             |
| R3-2s   | AGTATGACTGATGCTGATATTGT    | 787-809             | 703                |             |
| R3-2a   | AGTAGTGTTCTCCATAATTTAAAA   | 1466-1490           |                    |             |
| R4-1s   | AGTAGTGAACCTCCTTACATCATAAA | 1-25                | 774                | <b>RNA4</b> |
| R4-1a   | GCTCCAGACATTAGAGCTACT      | 753-774             |                    |             |
| R4-2s   | ATGAAAAAGTTCATTGGGATGT     | 701-722             | 771                |             |
| R4-2a   | AGTAGTGTTCTCCTTACATAACAAA  | 1351-1472           |                    |             |
| R5-1s   | AGTAGTGAACCTCCATAATTATAAT  | 1-25                | 849                | <b>RNA5</b> |
| R5-1a   | CTCTTTATTAAATCGAAGGCTA     | 828-849             |                    |             |
| R5-2s   | AGTCAAGCATCACAAATCATATG    | 753-774             | 999                |             |
| R5-2a   | AGTAGTGTTCTCCATAACTAATA    | 1728-1752           |                    |             |
| R6-1s   | AGTAGTGAACCTCCCTATAAAACAAA | 1-25                | 781                | <b>RNA6</b> |
| R6-1a   | TCGGTAATCTATATCTTAACTA     | 760-781             |                    |             |
| R6-2s   | ACATCTTCAGAACATATACATT     | 683-704             | 530                |             |
| R6-2a   | AGTAGTGTTCTCCCTATAAGATAAA  | 1189-1213           |                    |             |

**Table S2.** Sequence identity matrix determined from partial nucleotide sequences of RNA-1 (1), -2 (2) and -3 (3) segments of FMV from cyclamen and those from fig accessions present in the Genbank. Shadowed numbers represent the lowest identity found among different FMV isolates. Accession numbers of sequences used: RNA-1 (LN908800-LN908812, AB697827, AM941711, HQ703343), RNA-2 (LN908813-LN908825, AB697829, FM864225, HQ703344), RNA-3 (LN908826-LN908838, AB697785, FM991954, HQ703345).

| Isolates             | AD  | TD  | G   | Cic | GU  | Tu<br>BT152 | Tu<br>Bh113 | Tu<br>Bd55 | Tu<br>Zd32 | Alg<br>F3 | Fr<br>36 | Leb<br>35 | It<br>Gr10 | Tu<br>Tg122 | Tu<br>Zd5 | Tu<br>Ba176 | Tu<br>St50 | Tu<br>Bd62 | Tu<br>By145 | Jap<br>SB1 | Ca<br>can01 |
|----------------------|-----|-----|-----|-----|-----|-------------|-------------|------------|------------|-----------|----------|-----------|------------|-------------|-----------|-------------|------------|------------|-------------|------------|-------------|
| <b>AD</b>            | (1) |     |     |     |     |             |             |            |            |           |          |           |            |             |           |             |            |            |             |            |             |
|                      | (2) | 100 |     |     |     |             |             |            |            |           |          |           |            |             |           |             |            |            |             |            |             |
|                      | (3) |     |     |     |     |             |             |            |            |           |          |           |            |             |           |             |            |            |             |            |             |
| <b>TD</b>            | (1) | 96  | 100 |     |     |             |             |            |            |           |          |           |            |             |           |             |            |            |             |            |             |
|                      | (2) | 97  |     |     |     |             |             |            |            |           |          |           |            |             |           |             |            |            |             |            |             |
|                      | (3) | 98  |     |     |     |             |             |            |            |           |          |           |            |             |           |             |            |            |             |            |             |
| <b>G</b>             | (1) | 89  | 91  | 100 |     |             |             |            |            |           |          |           |            |             |           |             |            |            |             |            |             |
|                      | (2) | 93  | 94  |     |     |             |             |            |            |           |          |           |            |             |           |             |            |            |             |            |             |
|                      | (3) | 99  | 99  |     |     |             |             |            |            |           |          |           |            |             |           |             |            |            |             |            |             |
| <b>Cic</b>           | (1) | 89  | 90  | 99  | 100 |             |             |            |            |           |          |           |            |             |           |             |            |            |             |            |             |
|                      | (2) | 97  | 99  | 93  |     |             |             |            |            |           |          |           |            |             |           |             |            |            |             |            |             |
|                      | (3) | 98  | 99  | 99  |     |             |             |            |            |           |          |           |            |             |           |             |            |            |             |            |             |
| <b>GU</b>            | (1) | 86  | 87  | 93  | 93  | 100         |             |            |            |           |          |           |            |             |           |             |            |            |             |            |             |
|                      | (2) | 93  | 94  | 96  | 93  |             |             |            |            |           |          |           |            |             |           |             |            |            |             |            |             |
|                      | (3) | 99  | 99  | 99  | 99  |             |             |            |            |           |          |           |            |             |           |             |            |            |             |            |             |
| <b>Tu-<br/>BT152</b> | (1) | 96  | 98  | 92  | 91  | 88          | 100         |            |            |           |          |           |            |             |           |             |            |            |             |            |             |
|                      | (2) | 93  | 93  | 96  | 93  | 96          |             |            |            |           |          |           |            |             |           |             |            |            |             |            |             |
|                      | (3) | 97  | 98  | 98  | 98  | 97          |             |            |            |           |          |           |            |             |           |             |            |            |             |            |             |
| <b>Tu-<br/>Bh113</b> | (1) | 96  | 98  | 92  | 91  | 88          | 99          | 100        |            |           |          |           |            |             |           |             |            |            |             |            |             |
|                      | (2) | 92  | 93  | 92  | 93  | 93          | 93          |            |            |           |          |           |            |             |           |             |            |            |             |            |             |
|                      | (3) | 96  | 97  | 97  | 97  | 96          | 98          |            |            |           |          |           |            |             |           |             |            |            |             |            |             |

|                   |    |    |    |    |    |    |    |     |     |     |    |     |     |     |
|-------------------|----|----|----|----|----|----|----|-----|-----|-----|----|-----|-----|-----|
| <b>Tu-Bd55</b>    |    |    |    |    |    |    |    |     |     |     |    |     |     |     |
| (1)               | 96 | 97 | 91 | 91 | 87 | 99 | 99 | 100 |     |     |    |     |     |     |
| (2)               | 93 | 95 | 97 | 94 | 97 | 98 | 94 |     |     |     |    |     |     |     |
|                   | 97 | 97 | 98 | 97 | 97 | 99 | 98 |     |     |     |    |     |     |     |
| (3)               |    |    |    |    |    |    |    |     |     |     |    |     |     |     |
| <b>Tu-Zd32</b>    |    |    |    |    |    |    |    |     |     |     |    |     |     |     |
| (1)               | 96 | 97 | 91 | 91 | 88 | 99 | 99 | 98  | 100 |     |    |     |     |     |
| (2)               | 93 | 93 | 96 | 93 | 94 | 97 | 92 | 98  |     |     |    |     |     |     |
|                   | 97 | 98 | 98 | 98 | 98 | 99 | 98 | 98  |     |     |    |     |     |     |
| (3)               |    |    |    |    |    |    |    |     |     |     |    |     |     |     |
| <b>Alg-F3</b>     |    |    |    |    |    |    |    |     |     |     |    |     |     |     |
| (1)               | 96 | 97 | 91 | 91 | 87 | 99 | 99 | 98  | 99  | 100 |    |     |     |     |
| (2)               | 93 | 94 | 96 | 93 | 96 | 99 | 93 | 99  | 98  |     |    |     |     |     |
|                   | 97 | 98 | 98 | 98 | 97 | 99 | 98 | 99  | 99  |     |    |     |     |     |
| (3)               |    |    |    |    |    |    |    |     |     |     |    |     |     |     |
| <b>Fr-36 (1)</b>  |    |    |    |    |    |    |    |     |     |     |    |     |     |     |
| (1)               | 96 | 97 | 91 | 91 | 87 | 99 | 99 | 98  | 99  | 99  | 10 |     |     |     |
| (2)               | 93 | 93 | 94 | 93 | 94 | 96 | 93 | 97  | 96  | 96  |    |     |     |     |
|                   | 94 | 95 | 95 | 95 | 94 | 95 | 96 | 94  | 95  | 95  |    |     |     |     |
| (3)               |    |    |    |    |    |    |    |     |     |     |    |     |     |     |
| <b>Leb-35 (1)</b> |    |    |    |    |    |    |    |     |     |     |    |     |     |     |
| (1)               | 96 | 97 | 91 | 91 | 87 | 99 | 99 | 98  | 99  | 99  | 99 | 100 |     |     |
| (2)               | 94 | 96 | 95 | 95 | 95 | 96 | 95 | 97  | 95  | 96  | 95 |     |     |     |
|                   | 98 | 98 | 99 | 98 | 98 | 99 | 98 | 99  | 99  | 99  | 95 |     |     |     |
| (3)               |    |    |    |    |    |    |    |     |     |     |    |     |     |     |
| <b>It-Gr10</b>    |    |    |    |    |    |    |    |     |     |     |    |     |     |     |
| (1)               | 95 | 97 | 92 | 91 | 88 | 98 | 98 | 98  | 98  | 98  | 98 | 98  | 100 |     |
| (2)               | 97 | 98 | 93 | 97 | 93 | 94 | 94 | 95  | 94  | 94  | 94 | 96  |     |     |
|                   | 99 | 99 | 99 | 99 | 98 | 98 | 97 | 98  | 98  | 98  | 95 | 99  |     |     |
| (3)               |    |    |    |    |    |    |    |     |     |     |    |     |     |     |
| <b>Tu-Tg122</b>   |    |    |    |    |    |    |    |     |     |     |    |     |     |     |
| (1)               | 94 | 96 | 90 | 90 | 87 | 97 | 97 | 96  | 97  | 96  | 96 | 96  | 98  | 100 |
|                   | 92 | 93 | 92 | 93 | 93 | 93 | 99 | 94  | 92  | 93  | 93 | 95  | 94  |     |
|                   | 96 | 96 | 97 | 96 | 96 | 96 | 97 | 95  | 96  | 96  | 97 | 96  | 97  |     |

---

(2)

(3)

**Tu-Zd5**

(1)

89 90 88 87 84 97 91 91 92 91 91 92 90 90 100

(2)

93 94 93 93 94 94 93 95 93 94 95 95 94 93  
96 96 97 96 96 97 97 97 97 97 97 97 97 98

(3)

**Tu-Ba176**

(1)

91 92 89 89 86 94 94 93 94 94 94 94 93 91 96 100

(2)

93 93 96 93 96 98 93 98 97 98 96 96 94 93 94  
95 96 96 96 95 96 97 95 96 96 96 96 96 97 98

(3)

**Tu-St50**

(1)

86 88 86 86 83 89 89 89 89 89 89 90 88 87 91 91 100

(2)

94 94 94 94 95 94 95 96 95 95 95 96 95 95 96 94  
95 96 96 96 96 96 96 96 96 96 98 97 96 98 99 98

(3)

**Tu-Bd62**

(1)

89 90 89 88 85 92 92 91 92 92 92 92 91 90 94 93 97 100

(2)

93 95 94 94 95 95 96 96 94 95 95 96 95 96 95 95 96  
95 96 96 96 96 96 96 96 96 96 97 97 96 97 98 98 99

(3)

**Tu-By145(1)**

91 92 92 92 88 94 94 93 94 93 93 93 94 92 90 91 87 90 100

(2)

93 94 96 93 96 98 93 99 98 99 96 96 94 93 94 99 95 95

(3)

97 98 98 99 98 99 98 98 99 99 96 99 98 97 97 97 97 97

**Jap-SB1 (1)**

90 91 95 95 93 92 92 92 92 92 92 92 92 91 89 90 87 89 93 100

(2)

94 96 96 95 96 96 93 97 95 96 95 97 95 93 94 96 95 96 96

(3)

97 98 98 98 97 97 97 97 97 97 95 98 97 96 96 96 96 96 97

**Ca-Can01(1)**

85 86 89 89 88 87 87 87 87 86 86 86 87 86 86 86 83 85 86 90

(2)

90 90 92 91 91 90 89 92 91 91 90 92 90 89 89 91 90 91 94 100

(3)

93 93 93 94 93 93 94 93 93 93 93 94 93 94 94 94 94 93 94 95

---
